# Supplementary material for: Highly divergent dengue virus type 1 genotype sets a new distance record
Source: PubMed Central journal article supplement (PMC4770315; doi:10.1038/srep22356), 2016-02-29
Supplement: srep22356-s1.pdf [file srep22356-s1.pdf]

## Supplementary Information

**Manuscript Title: Highly divergent dengue virus type 1 genotype sets a new distance record**

**Author List:** Alyssa T. Pyke<sup>1\*</sup>, Peter R. Moore<sup>1</sup>, Carmel T. Taylor<sup>1</sup>, Sonja Hall-Mendelin<sup>1</sup>, Jane N. Cameron<sup>1</sup>, Glen R. Hewitson<sup>1</sup>, Dennis S. Pukallus<sup>1</sup>, Bixing Huang<sup>1</sup>, David Warrilow<sup>1</sup> and Andrew F. van den Hurk<sup>1</sup>

<sup>1</sup> Public Health Virology Laboratory, Forensic and Scientific Services, Coopers Plains, Queensland, Australia

Corresponding Author\*: [Alyssa.Pyke@health.qld.gov.au](mailto:Alyssa.Pyke@health.qld.gov.au)

**Supplementary Table S1** Summary of DENV isolate sequences used in the study.

| Serotype | Genotype | Year | GenBank accession number | Country                | Strain                        |
|----------|----------|------|--------------------------|------------------------|-------------------------------|
| DENV-1   | I        | 1943 | AB074760                 | Japan                  | Mochizuki                     |
| DENV-1   | I        | 1944 | EU848545                 | Hawaii                 | VR-1254                       |
| DENV-1   | II       | 1954 | D10513                   | Thailand               | TH-SMAN                       |
| DENV-1   | II       | 1960 | JF297570                 | Thailand               | 606147                        |
| DENV-1   | II       | 1960 | JQ922547                 | Thailand               | DENV-1/THAI/606147/1960       |
| DENV-1   | V        | 1962 | JF297572                 | India                  | 62237                         |
| DENV-1   | V        | 1963 | JQ922544                 | India                  | IND/631288/1963               |
| DENV-1   | II       | 1963 | AF425629                 | Thailand               | 2543-63                       |
| DENV-1   | II       | 1964 | AF180817                 | Thailand               | 16007                         |
| DENV-1   | V        | 1968 | AF425625                 | Nigeria                | IBH 28328                     |
| DENV-1   | V        | 1971 | JQ922546                 | India                  | DENV-1/IND/715393/1971        |
| DENV-1   | V        | 1971 | AY713473                 | Myanmar                | D1.Myanmar.40553/71           |
| DENV-1   | III      | 1972 | EF457905                 | Malaysia               | P72-1244                      |
| DENV-1   | IV       | 1974 | U88535                   | Nauru                  | Nauru Island, Western Pacific |
| DENV-1   | V        | 1976 | AY722801                 | Myanmar                | D1.Myanmar.40568/76           |
| DENV-1   | V        | 1977 | JN379478                 | Grenada                | CAREC 778164                  |
| DENV-1   | V        | 1980 | AY732476                 | Thailand               | ThD1_0442_80                  |
| DENV-1   | V        | 1980 | AY732474                 | Thailand               | ThD1_0673_80                  |
| DENV-1   | I        | 1980 | AF425630                 | Thailand               | PUO 359                       |
| DENV-1   | I        | 1981 | AY732483                 | Thailand               | ThD1_0008_81                  |
| DENV-1   | IV       | 1983 | AF425611                 | Australia              | AUS HCS1                      |
| DENV-1   | V        | 1985 | GQ868601                 | British Virgin Islands | DENV-1/VG/BID-V2937/1985      |
| DENV-1   | V        | 1985 | AF425620                 | Cote d'Ivoire          | DAKAR A-1520                  |
| DENV-1   | I        | 1987 | AF425628                 | Taiwan                 | 765101                        |
| DENV-1   | IV       | 1988 | AB600923                 | Indonesia              | D1/JKTA88/88                  |
| DENV-1   | V        | 1989 | AF226687                 | French Guiana          | FGA/89                        |
| DENV-1   | I        | 1990 | M87512                   | Singapore              | Singapore S275/90             |
| DENV-1   | I        | 1990 | JN638342                 | Thailand               | D90-1197                      |
| DENV-1   | V        | 1990 | AF226685                 | Brazil                 | Den1BR/90                     |
| DENV-1   | I        | 1991 | AY732477                 | Thailand               | ThD1_0336_91                  |
| DENV-1   | V        | 1991 | AF425626                 | Peru                   | DEI 0151                      |
| DENV-1   | I        | 1991 | AY732413                 | Thailand               | ThD1_0119_91                  |
| DENV-1   | IV       | 1991 | FJ196845                 | China                  | GD03/91                       |
| DENV-1   | V        | 1993 | DQ285562                 | Comoros                | Comoros 04.329/93             |
| DENV-1   | V        | 1993 | AY153757                 | Costa Rica             | cesara12                      |
| DENV-1   | V        | 1993 | AY762084                 | Singapore              | Singapore 8114/93             |
| DENV-1   | I        | 1993 | AY732461                 | Thailand               | ThD1_K0022_93                 |
| DENV-1   | I        | 1994 | AB608789                 | Taiwan                 | 360052                        |
| DENV-1   | V        | 1994 | AM746218                 | Saudi Arabia           | 945                           |
| DENV-1   | I        | 1994 | AY732480                 | Thailand               | ThD1_0097_94                  |
| DENV-1   | IV       | 1995 | FJ196846                 | China                  | GD95/95                       |
| DENV-1   | I        | 1995 | JN638344                 | Thailand               | 00407/95                      |
| DENV-1   | V        | 1995 | AF425632                 | Venezuela              | 6222                          |

|        |     |      |          |                                         |                          |
|--------|-----|------|----------|-----------------------------------------|--------------------------|
| DENV-1 | V   | 1995 | JN379486 | Barbados                                | CAREC 9510153            |
| DENV-1 | IV  | 1995 | DQ855297 | China                                   | GZ01/95                  |
| DENV-1 | V   | 1996 | AY722802 | Myanmar                                 | D1.Myanmar.23819/96      |
| DENV-1 | I   | 1997 | JN638340 | Thailand                                | 30231/97                 |
| DENV-1 | V   | 1997 | AF311956 | Brazil                                  | BR/97-111                |
| DENV-1 | IV  | 1998 | AB189121 | Indonesia                               | 98901530 DF DV-1         |
| DENV-1 | I   | 1998 | AF309641 | Cambodia                                | D1/H/IMTSSA/98/658       |
| DENV-1 | I   | 1998 | AF298808 | Djibouti                                | D1/H/IMTSSA/98/606       |
| DENV-1 | V   | 1998 | GQ868559 | Columbia                                | DENV-1/CO/BID-V3376/1998 |
| DENV-1 | I   | 1998 | AY726555 | Myanmar                                 | D1.Myanmar.31459/98      |
| DENV-1 | IV  | 1998 | AB189121 | Indonesia                               | 98901530 DF DV-1         |
| DENV-1 | V   | 1998 | AF298807 | Cote d'Ivoire                           | Abidjan                  |
| DENV-1 | IV  | 1999 | AY422785 | Philippines                             | 99SA236                  |
| DENV-1 | V   | 2000 | AF514883 | Paraguay                                | 259par00                 |
| DENV-1 | V   | 2000 | AF514889 | Argentina                               | 297arg00                 |
| DENV-1 | I   | 2000 | AY620951 | Myanmar                                 | My00D136393              |
| DENV-1 | IV  | 2000 | JN415515 | Palau                                   | Palau 2000               |
| DENV-1 | IV  | 2000 | JN415499 | East Timor                              | ET00 243                 |
| DENV-1 | IV  | 2001 | DQ672564 | Hawaii                                  | HawO3663                 |
| DENV-1 | I   | 2001 | AY713476 | Myanmar                                 | D1.Myanmar.305/01        |
| DENV-1 | I   | 2001 | AY732479 | Thailand                                | ThD1_0102_01             |
| DENV-1 | I   | 2001 | AY732464 | Thailand                                | ThD1_K0407_01            |
| DENV-1 | IV  | 2001 | AY630407 | French Polynesia                        | FP/01/192206             |
| DENV-1 | IV  | 2001 | DQ672564 | Hawaii                                  | HawO3663                 |
| DENV-1 | IV  | 2002 | KF559254 | Myanmar                                 | M49440                   |
| DENV-1 | IV  | 2002 | JN415503 | Fiji                                    | Fiji 2002                |
| DENV-1 | IV  | 2002 | EU863650 | Chile: Easter Island                    | CHI3336-02               |
| DENV-1 | IV  | 2003 | FJ196842 | China                                   | GD66/03                  |
| DENV-1 | V   | 2003 | JN379472 | Barbados                                | CAREC 0308216            |
| DENV-1 | IV  | 2003 | JN415488 | Indonesia                               | Bali 2003                |
| DENV-1 | IV  | 2003 | AB195673 | Seychelles                              | NIID03-41                |
| DENV-1 | V   | 2004 | EU596501 | Nicaragua                               | DENV-1/NI/BID-V653/2004  |
| DENV-1 | V   | 2004 | JN415524 | Sri Lanka                               | Sri Lanka 2004           |
| DENV-1 | I   | 2004 | FR666922 | Malaysia                                | D1/Malaysia/33087/04     |
| DENV-1 | I   | 2004 | AM746216 | Saudi Arabia                            | 6633                     |
| DENV-1 | I   | 2004 | AY835999 | China                                   | ZJ01/2004                |
| DENV-1 | IV  | 2004 | AY858983 | Indonesia                               | SC01                     |
| DENV-1 | IV  | 2004 | AB204803 | Federated States of<br>Micronesia (Yap) | NIID04-27                |
| DENV-1 | V   | 2005 | EU081258 | Singapore                               | D1/SG/05K4147DK1/2005    |
| DENV-1 | I   | 2005 | EU081226 | Singapore                               | D1/SG/05K814DK1/2005     |
| DENV-1 | III | 2005 | FN825674 | Malaysia                                | D1/Malaysia/36046/05     |
| DENV-1 | V   | 2005 | EU179860 | Brunei                                  | DS06-210505              |
| DENV-1 | V   | 2005 | JF297581 | India                                   | 55290                    |
| DENV-1 | IV  | 2005 | JN415516 | Philippines                             | Philippines 2005         |
| DENV-1 | V   | 2005 | JQ922548 | India                                   | DENV-1/IND/55290/2005    |
| DENV-1 | I   | 2006 | FJ196844 | China                                   | GD02/06                  |

|        |    |      |          |                  |                           |
|--------|----|------|----------|------------------|---------------------------|
| DENV-1 | V  | 2006 | HQ332182 | Venezuela        | VE_61006_2006             |
| DENV-1 | I  | 2006 | JN415533 | Vietnam          | Vietnam 2006              |
| DENV-1 | I  | 2007 | JN415523 | South East Asia  | Southeast Asia 2007       |
| DENV-1 | V  | 2007 | GU131962 | Mexico           | DENV-1/MX/BID-V3669/2007  |
| DENV-1 | I  | 2008 | KC172829 | Laos             | XB998_Laos_2008           |
| DENV-1 | I  | 2008 | AB608787 | Taiwan           | SDDF1543                  |
| DENV-1 | V  | 2008 | JN415506 | Guyana           | Guyana 2008               |
| DENV-1 | V  | 2008 | GU131863 | Brazil           | DENV-1/BR/BID-V3490/2008  |
| DENV-1 | V  | 2008 | JN903579 | India            | D1/IN/RGCB419/2008        |
| DENV-1 | V  | 2008 | GQ357692 | Singapore        | SG(EHI)DED65008           |
| DENV-1 | I  | 2008 | GU131792 | Vietnam South    | DENV-1/VN/BID-V4034/2008  |
| DENV-1 | I  | 2008 | JN415521 | Singapore        | Singapore 2008            |
| DENV-1 | I  | 2008 | JN415527 | Thailand         | Thailand 2008b            |
| DENV-1 | I  | 2008 | JN415534 | Vietnam          | Vietnam 2008a             |
| DENV-1 | I  | 2008 | KR919821 | Australia        | TSV08                     |
| DENV-1 | V  | 2009 | KC692495 | Argentina        | HNRG12188                 |
| DENV-1 | V  | 2009 | JN903581 | India            | D1/IN/RGCB592/2009        |
| DENV-1 | V  | 2009 | JF960211 | Singapore        | SG(EHI)D1/0091Y09         |
| DENV-1 | I  | 2009 | JN415519 | PNG              | PNG 2009                  |
| DENV-1 | I  | 2009 | GU131895 | Cambodia         | DENV-1/IPC/BID-V3787/2009 |
| DENV-1 | I  | 2009 | HQ891316 | Sri Lanka        | DV1_SL_2009d              |
| DENV-1 | IV | 2010 | JQ915080 | New Caledonia    | NC10/080810-1138          |
| DENV-1 | I  | 2010 | HG316481 | Thailand         | KDH0026A                  |
| DENV-1 | I  | 2010 | HG316482 | Thailand         | KDH0030A                  |
| DENV-1 | V  | 2010 | KC692512 | Argentina        | HNRG25001                 |
| DENV-1 | I  | 2010 | KC182084 | Laos             | LNT1975_Laos_2010         |
| DENV-1 | IV | 2010 | KR919811 | Philippines      | Phil 2010                 |
| DENV-1 | IV | 2010 | JN415492 | Indonesia        | Bali 2010d                |
| DENV-1 | IV | 2010 | JN415494 | Indonesia        | Bali 2010f                |
| DENV-1 | IV | 2010 | JN415513 | Malaysia         | Malaysia 2010             |
| DENV-1 | V  | 2010 | KJ189367 | Puerto Rico      | DENV-1/PR/BID-v8188/2010  |
| DENV-1 | V  | 2010 | JQ675358 | USA              | DENV-1/BOL-KW010          |
| DENV-1 | I  | 2011 | KJ649286 | Saudi Arabia     | DENV-1-Jeddah             |
| DENV-1 | I  | 2011 | KR919805 | Indonesia        | Bali 2011                 |
| DENV-1 | I  | 2011 | KC848576 | Somalia          | SO/DB118/2011             |
| DENV-1 | IV | 2011 | KR919815 | Papua New Guinea | PNG 2011                  |
| DENV-1 | IV | 2011 | JX298570 | Fiji             | Fiji 2011b                |
| DENV-1 | V  | 2011 | KF289072 | India            | RR107                     |
| DENV-1 | IV | 2012 | KJ933413 | China            | Su1                       |
| DENV-1 | I  | 2012 | KJ726662 | Sri Lanka        | SL_2012_GS0319            |
| DENV-1 | I  | 2012 | KR919808 | Australia        | Cairns 2012               |
| DENV-1 | IV | 2012 | KR919819 | Philippines      | Phil 2012                 |
| DENV-1 | IV | 2012 | KR919813 | Indonesia        | Indo 2012                 |
| DENV-1 | V  | 2012 | KF973455 | Nicaragua        | DENV-1/NI/BID-V7650/2012  |
| DENV-1 | V  | 2013 | KF864667 | China            | Zj/yw01                   |
| DENV-1 | I  | 2013 | KR919806 | Indonesia        | Bali 2013                 |

|        |                |      |          |                  |                            |
|--------|----------------|------|----------|------------------|----------------------------|
| DENV-1 | I              | 2013 | KR919807 | Thailand         | Thai 2013                  |
| DENV-1 | I              | 2013 | KR919809 | Cambodia         | Cam 2013                   |
| DENV-1 | I              | 2013 | KR919817 | Vanuatu          | Van 2013                   |
| DENV-1 | I              | 2013 | KF184975 | Angola           | Angola_2013                |
| DENV-1 | V              | 2014 | KM458188 | USA              | US/DB167/2014              |
| DENV-1 | I              | 2014 | LC002828 | Japan            | D1/Hu/Saitama/NIID100/2014 |
| DENV-1 | I              | 2014 | KR919816 | East Timor       | ET2014                     |
| DENV-1 | IV             | 2014 | KR919812 | Indonesia        | Bali 2014                  |
| DENV-1 | IV             | 2014 | KR919818 | Papua New Guinea | PNG 2014b                  |
| DENV-1 | IV             | 2014 | KR919814 | Papua New Guinea | PNG 2014a                  |
| DENV-1 | VI - Sylvatic  | 2014 | KR919820 | Brunei           | Brun2014                   |
| DENV-1 | IV             | 2015 | KR919810 | Australia        | Tully 2015                 |
| DENV-2 | Asian II       | 1944 | AF038403 | Papua New Guinea | New Guinea C               |
| DENV-2 | Asian I        | 1964 | U87411   | Thailand         | 16681                      |
| DENV-2 | Sylvatic       | 1966 | EF105387 | Nigeria          | IBH11208                   |
| DENV-2 | Sylvatic       | 1966 | EU003591 | Nigeria          | IBH11234                   |
| DENV-2 | Sylvatic       | 1966 | EF105388 | Nigeria          | IBH11664                   |
| DENV-2 | Sylvatic       | 1970 | EF105384 | Senegal          | Dak HD 10674               |
| DENV-2 | Sylvatic       | 1970 | EF105379 | Malaysia         | P8-1407                    |
| DENV-2 | Asian I        | 1974 | DQ181806 | Thailand         | ThD2_0038_74               |
| DENV-2 | Sylvatic       | 1974 | EF105385 | Senegal          | Dak Ar D20761              |
| DENV-2 | American       | 1977 | EU056812 | Puerto Rico      | 1328                       |
| DENV-2 | Sylvatic       | 1980 | EF105382 | Burkina Faso     | Dak Ar 2039                |
| DENV-2 | Sylvatic       | 1980 | EF105380 | Cote d'Ivoire    | Dak Ar 578                 |
| DENV-2 | Sylvatic       | 1980 | EF105383 | Cote d'Ivoire    | Dak Ar A1247               |
| DENV-2 | Sylvatic       | 1980 | EF105386 | Burkina Faso     | Dak Ar A2022               |
| DENV-2 | Sylvatic       | 1980 | EF105381 | Cote d'Ivoire    | Dak Ar 510                 |
| DENV-2 | Sylvatic       | 1981 | EF105378 | Guinea           | PM33974                    |
| DENV-2 | Asian/American | 1983 | M20558   | Jamaica          | Jamaica/N.1409             |
| DENV-2 | Cosmopolitan   | 1993 | AY037116 | Australia        | TSV01                      |
| DENV-2 | American       | 1994 | JX966379 | Mexico           | DENV2-QR94                 |
| DENV-2 | Asian I        | 1998 | DQ181799 | Thailand         | ThD2_0017_98               |
| DENV-2 | Asian/American | 1998 | AF208496 | Martinique       | DEN2/H/IMTSSA-MART/98-703  |
| DENV-2 | Cosmopolitan   | 1999 | AF359579 | China            | FJ11/99                    |
| DENV-2 | Sylvatic       | 1999 | EF105389 | Senegal          | Dak Ar 141069              |
| DENV-2 | Sylvatic       | 1999 | EF105390 | Senegal          | Dak Ar 141070              |
| DENV-2 | Sylvatic       | 1999 | EF457904 | Senegal          | Dak Ar D75505              |
| DENV-2 | Cosmopolitan   | 2005 | EU179858 | Brunei           | DS04-221205                |
| DENV-2 | Sylvatic       | 2008 | FJ467493 | Malaysia         | DKD811                     |
| DENV-2 | Sylvatic       | 2009 | JF260983 | Guinea-Bassau    | EEB-17                     |
| DENV-2 | Asian/American | 2011 | KC294207 | Peru             | DENV-2/PE/FPI01202/2011    |
| DENV-3 | V              | 1956 | M93130   | Philippines      | H87                        |
| DENV-3 | V              | 1980 | AF317645 | China            | 80-2                       |
| DENV-3 | II             | 1987 | AY676353 | Thailand         | ThD3_0007_87               |
| DENV-3 | III            | 1989 | JQ411814 | Sri Lanka        | UNC3001                    |
| DENV-3 | I              | 1994 | AY744685 | French Polynesia | PF94/136116                |

|        |          |      |          |            |                                |
|--------|----------|------|----------|------------|--------------------------------|
| DENV-3 | II       | 1994 | AY923865 | Thailand   | C0360/94                       |
| DENV-3 | I        | 1995 | DQ675519 | Taiwan     | 95TW466                        |
| DENV-3 | II       | 1998 | JN406514 | Australia  | Cairns 98                      |
| DENV-3 | III      | 1999 | AY099337 | Martinique | D3/H/IMTSSA-<br>MART/1999/1243 |
| DENV-3 | III      | 2000 | AY099336 | Sri Lanka  | D3/H/IMTSSA-SRI/2000/1266      |
| DENV-3 | III      | 2004 | EF629367 | Brazil     | BR DEN3 97-04                  |
| DENV-3 | III      | 2005 | EU081198 | Singapore  | D3/SG/05K2933DK1/2005          |
| DENV-3 | III      | 2006 | HQ332171 | Venezuela  | VE_61035_2006                  |
| DENV-3 | I        | 2008 | JN406515 | Australia  | Cairns 2008                    |
| DENV-3 | II       | 2010 | HG316484 | Thailand   | KDH0014A                       |
| DENV-4 | I        | 1961 | JF262783 | India      | INDIA G11337                   |
| DENV-4 | Sylvatic | 1973 | JF262780 | Malaysia   | P73-1120                       |
| DENV-4 | Sylvatic | 1975 | EF457906 | Malaysia   | P75-215                        |
| DENV-4 | Sylvatic | 1975 | JF262779 | Malaysia   | P75-514                        |
| DENV-4 | II       | 1981 | AF326573 | Dominica   | Dominica 1981                  |
| DENV-4 | II       | 1994 | JF262782 | Haiti      | Haiti73                        |
| DENV-4 | II       | 1995 | JF262781 | Venezuela  | INH6412                        |
| DENV-4 | III      | 1997 | AY618989 | Thailand   | ThD4_0017_97                   |
| DENV-4 | II       | 2000 | AY618993 | Thailand   | ThD4_0734_00                   |
| DENV-4 | I        | 2001 | AY618992 | Thailand   | ThD4_0485_01                   |
| DENV-4 | I        | 2009 | KF041260 | Pakistan   | D4/Pakistan/150/2009           |
| DENV-4 | II       | 2010 | JQ822247 | China      | GZ30                           |
| DENV-4 | II       | 2010 | JN983813 | Brazil     | Br246RR/10                     |
| DENV-4 | II       | 2010 | JX024758 | Singapore  | EHI310A129SY10                 |

**Supplementary Table S2.** Summary of significant amino acid substitutions between Brun2014 and a consensus DENV-1 sequence<sup>a</sup>.

| Gene          | Site <sup>b</sup> | Amino acid substitution <sup>c</sup> | Unique amino acid substitutions <sup>d</sup> |                                              |
|---------------|-------------------|--------------------------------------|----------------------------------------------|----------------------------------------------|
| <i>Capsid</i> | 39                | S → T                                | *                                            |                                              |
|               | 99                | K → R                                | HQ891316<br>KJ726662                         |                                              |
|               | 101               | S → T                                | EF457905                                     |                                              |
|               | 103               | T → V                                | *                                            |                                              |
|               | 104               | M → A                                | *                                            |                                              |
|               | 111               | T → M                                | *                                            |                                              |
|               | 113               | L → F                                | *                                            |                                              |
|               | 114               | A → S                                | *                                            |                                              |
|               | <i>prM</i>        | 15                                   | S → N                                        | EF457905                                     |
|               |                   | 29                                   | A → G                                        | *                                            |
| 31            |                   | V → I                                | AF514889                                     |                                              |
| 43            |                   | E → D                                | *                                            |                                              |
| 79            |                   | T → I                                | *                                            |                                              |
| 82            |                   | Q → P                                | *                                            |                                              |
| 89            |                   | D → E                                | KF864667<br>KC692512<br>KJ189367             |                                              |
| <i>M</i>      |                   | 16                                   | T → A                                        | AB074760<br>EU848545<br>JQ922547<br>EF457905 |
|               | 52                | A → I                                | *                                            |                                              |
|               | 62                | I → V                                | *                                            |                                              |
|               | <i>E</i>          | 6                                    | I → V                                        | EF457905<br>FN825674                         |
| 51            |                   | T → S                                | AY732461                                     |                                              |
| 64            |                   | K → R                                | DQ672564                                     |                                              |
| 81            |                   | T → S                                | *                                            |                                              |
| 83            |                   | V → S                                | *                                            |                                              |
| 120           |                   | K → E                                | EF457905<br>FN825674                         |                                              |
| 122           |                   | V → L                                | *                                            |                                              |
| 125           |                   | L → M                                | *                                            |                                              |
| 157           |                   | E → G                                | EF457905<br>FN825674                         |                                              |
| 221           |                   | T → A                                | *                                            |                                              |
| 226           |                   | T → S                                | *                                            |                                              |
| 227           |                   | S → P                                | AB074760<br>EU848545                         |                                              |
| 309           |                   | E → K                                | AB074760                                     |                                              |
| 325           |                   | K → E                                | *                                            |                                              |
| 338           |                   | S → T                                | *                                            |                                              |
| 378           |                   | I → M                                | *                                            |                                              |

|             |     |                   |                                  |
|-------------|-----|-------------------|----------------------------------|
|             | 382 | $A \rightarrow V$ | JN415527<br>JN415503             |
|             | 384 | $E \rightarrow D$ | *                                |
|             | 398 | $I \rightarrow L$ | *                                |
|             | 425 | $I \rightarrow V$ | GU131792<br>AY835999             |
|             | 461 | $I \rightarrow L$ | *                                |
|             | 484 | $M \rightarrow I$ | *                                |
|             | 485 | $V \rightarrow I$ | AB195673                         |
| <i>NS1</i>  | 2   | $S \rightarrow T$ | JN903579                         |
|             | 6   | $I \rightarrow V$ | AB074760                         |
|             | 52  | $E \rightarrow D$ | *                                |
|             | 72  | $S \rightarrow A$ | *                                |
|             | 77  | $H \rightarrow Y$ | GQ868601                         |
|             | 94  | $N \rightarrow K$ | *                                |
|             | 103 | $M \rightarrow G$ | *                                |
|             | 146 | $D \rightarrow S$ | EF457905                         |
|             | 192 | $K \rightarrow R$ | AB074760                         |
|             | 213 | $A \rightarrow S$ | *                                |
|             | 290 | $H \rightarrow Q$ | *                                |
| <i>NS2a</i> | 4   | $E \rightarrow K$ | *                                |
|             | 7   | $S \rightarrow N$ | KF864667<br>KF184975             |
|             | 19  | $I \rightarrow V$ | KF864667<br>KF184975             |
|             | 29  | $R \rightarrow G$ | *                                |
|             | 37  | $L \rightarrow M$ | *                                |
|             | 44  | $I \rightarrow V$ | GU131962                         |
|             | 56  | $L \rightarrow V$ | AY722802                         |
|             | 63  | $N \rightarrow H$ | *                                |
|             | 65  | $S \rightarrow L$ | *                                |
|             | 67  | $R \rightarrow S$ | *                                |
|             | 83  | $M \rightarrow I$ | *                                |
|             | 87  | $F \rightarrow L$ | *                                |
|             | 95  | $R \rightarrow K$ | JQ922547                         |
|             | 101 | $V \rightarrow I$ | *                                |
|             | 111 | $V \rightarrow I$ | *                                |
|             | 112 | $A \rightarrow T$ | *                                |
|             | 113 | $S \rightarrow P$ | *                                |
|             | 120 | $L \rightarrow I$ | *                                |
|             | 143 | $H \rightarrow Y$ | *                                |
|             | 168 | $M \rightarrow A$ | *                                |
|             | 194 | $V \rightarrow I$ | *                                |
|             | 210 | $T \rightarrow S$ | *                                |
|             | 218 | $K \rightarrow R$ | GU131895<br>AB189121             |
| <i>NS2b</i> | 4   | $L \rightarrow I$ | HQ332182<br>GQ868601<br>KF973455 |



|             |     |                   |          |
|-------------|-----|-------------------|----------|
|             | 18  | $L \rightarrow M$ | *        |
|             | 39  | $I \rightarrow V$ | JQ922547 |
|             | 52  | $S \rightarrow T$ | *        |
|             | 56  | $A \rightarrow T$ | *        |
|             | 71  | $S \rightarrow A$ | *        |
|             | 92  | $D \rightarrow E$ | *        |
|             | 102 | $T \rightarrow A$ | *        |
|             | 106 | $V \rightarrow L$ | *        |
| <i>NS3</i>  | 7   | $T \rightarrow I$ | *        |
|             | 30  | $L \rightarrow V$ | *        |
|             | 31  | $L \rightarrow F$ | *        |
|             | 59  | $M \rightarrow T$ | *        |
|             | 91  | $T \rightarrow V$ | *        |
|             | 112 | $A \rightarrow V$ | *        |
|             | 119 | $P \rightarrow H$ | *        |
|             | 143 | $E \rightarrow D$ | *        |
|             | 146 | $I \rightarrow V$ | *        |
|             | 168 | $A \rightarrow S$ | *        |
|             | 170 | $A \rightarrow V$ | *        |
|             | 187 | $R \rightarrow K$ | *        |
|             | 212 | $A \rightarrow S$ | *        |
|             | 216 | $K \rightarrow R$ | *        |
|             | 239 | $M \rightarrow L$ | *        |
|             | 249 | $K \rightarrow R$ | *        |
|             | 250 | $S \rightarrow N$ | *        |
|             | 323 | $V \rightarrow A$ | *        |
|             | 331 | $A \rightarrow S$ | *        |
|             | 334 | $Q \rightarrow Y$ | *        |
|             | 338 | $R \rightarrow K$ | EU863650 |
|             |     |                   | AB195673 |
|             | 356 | $P \rightarrow Q$ | *        |
|             | 368 | $S \rightarrow T$ | *        |
|             | 401 | $N \rightarrow S$ | *        |
|             | 405 | $Y \rightarrow F$ | *        |
|             | 436 | $K \rightarrow R$ | *        |
|             | 467 | $N \rightarrow S$ | *        |
|             | 556 | $F \rightarrow I$ | *        |
|             | 559 | $S \rightarrow A$ | *        |
|             | 562 | $R \rightarrow K$ | EU848545 |
|             | 573 | $V \rightarrow I$ | *        |
| <i>NS4a</i> | 15  | $Q \rightarrow H$ | *        |
|             | 60  | $L \rightarrow M$ | *        |
|             | 63  | $V \rightarrow T$ | *        |
|             | 69  | $T \rightarrow A$ | *        |
|             | 110 | $I \rightarrow V$ | *        |
| <i>2K</i>   | 16  | $F \rightarrow V$ | *        |
|             | 17  | $M \rightarrow L$ | *        |
| <i>NS4b</i> | 17  | $H \rightarrow S$ | *        |

NS5

|     |                   |                                  |
|-----|-------------------|----------------------------------|
| 22  | $N \rightarrow I$ | *                                |
| 23  | $H \rightarrow Q$ | AF514889                         |
| 26  | $A \rightarrow T$ | *                                |
| 28  | $M \rightarrow I$ | AF311956                         |
| 53  | $M \rightarrow L$ | EF457905                         |
| 64  | $I \rightarrow M$ | *                                |
| 106 | $L \rightarrow M$ | *                                |
| 133 | $E \rightarrow D$ | *                                |
| 163 | $A \rightarrow T$ | KF184975<br>KF864667<br>JQ675358 |
| 191 | $L \rightarrow F$ | *                                |
| 247 | $G \rightarrow N$ | *                                |
| 23  | $S \rightarrow L$ | *                                |
| 39  | $S \rightarrow T$ | *                                |
| 52  | $K \rightarrow R$ | GU131792                         |
| 181 | $I \rightarrow V$ | DQ672564                         |
| 195 | $Q \rightarrow R$ | EF457905<br>KJ189367             |
| 245 | $A \rightarrow T$ | EF457905<br>AF514889<br>KF289072 |
| 253 | $R \rightarrow K$ | AY726555                         |
| 372 | $I \rightarrow V$ | *                                |
| 375 | $V \rightarrow I$ | *                                |
| 378 | $K \rightarrow G$ | *                                |
| 382 | $G \rightarrow K$ | *                                |
| 387 | $N \rightarrow K$ | AY722802                         |
| 426 | $E \rightarrow D$ | *                                |
| 435 | $H \rightarrow N$ | *                                |
| 500 | $E \rightarrow D$ | *                                |
| 522 | $S \rightarrow A$ | *                                |
| 523 | $K \rightarrow R$ | JQ922547                         |
| 544 | $E \rightarrow D$ | *                                |
| 551 | $K \rightarrow R$ | GU131895                         |
| 552 | $I \rightarrow V$ | EF457905                         |
| 554 | $D \rightarrow E$ | GU131962                         |
| 555 | $I \rightarrow L$ | *                                |
| 559 | $E \rightarrow D$ | *                                |
| 562 | $L \rightarrow Q$ | AY835999                         |
| 569 | $K \rightarrow R$ | *                                |
| 583 | $A \rightarrow G$ | *                                |
| 627 | $I \rightarrow V$ | *                                |
| 640 | $E \rightarrow N$ | *                                |
| 697 | $K \rightarrow R$ | *                                |
| 830 | $S \rightarrow T$ | *                                |
| 853 | $T \rightarrow S$ | *                                |
| 860 | $T \rightarrow I$ | *                                |
| 871 | $R \rightarrow K$ | *                                |

|     |       |          |
|-----|-------|----------|
| 877 | N → H | *        |
| 879 | L → Q | *        |
| 886 | K → R | *        |
| 893 | D → E | AY835999 |
|     |       | HQ891316 |
|     |       | KJ726662 |

---

<sup>a</sup>Amino acid comparison (3392 residues) of Brun2014 with a consensus sequence derived from DENV-1 sequences representing each of the five DENV-1 genotypes. <sup>b</sup>Amino acid numbering is given from the start of each gene.

<sup>c</sup>Amino acid substitutions are shown with residues from the DENV-1 consensus sequence on the left and those from Brun2014 on the right.

<sup>d</sup>Asterisk (\*) denotes amino acid substitutions which are unique to Brun2014. GenBank accession numbers are also given for DENV-1 strains which contained the same amino acid substitutions as Brun2014.

**Supplementary Table S3** 5'/3' RACE primers used in the study.

|         | Primer name  | Sequence <sup>a</sup>                                             |
|---------|--------------|-------------------------------------------------------------------|
| 5' RACE | Bru 576r     | 5'- <sup>576</sup> TCTTCACATAGATCCCCCAAGTCC <sup>553</sup> -3'    |
|         | Bru 540r     | 5'- <sup>540</sup> GTGCACATGTTAATACCCCCT- <sup>520</sup> 3'       |
|         | Towns 480r   | 5'- <sup>480</sup> CTGACTATCATGTGCGGCTCTC <sup>459</sup> -3'      |
|         | Towns 451r   | 5'- <sup>451</sup> TGTAGTCAAATGGAACGCCAAG <sup>430</sup> -3'      |
| 3' RACE | Bru 10427f   | 5'- <sup>10,427</sup> GGCTTGAGCAAACCGTGCT <sup>10,445</sup> -3'   |
|         | Bru 10474f   | 5'- <sup>10,474</sup> AACCTGGGAGGCTGCAAT <sup>10,491</sup> -3'    |
|         | Towns 10248f | 5'- <sup>10,248</sup> TCAAGAACGAGAGTGATCCCG <sup>10,268</sup> -3' |
|         | Towns 10325f | 5'- <sup>10,325</sup> AACAAGGCAAGAAGTCAGGCC <sup>10,345</sup> -3' |

<sup>a</sup>Primer sequences are given with corresponding genome nucleotide positions.

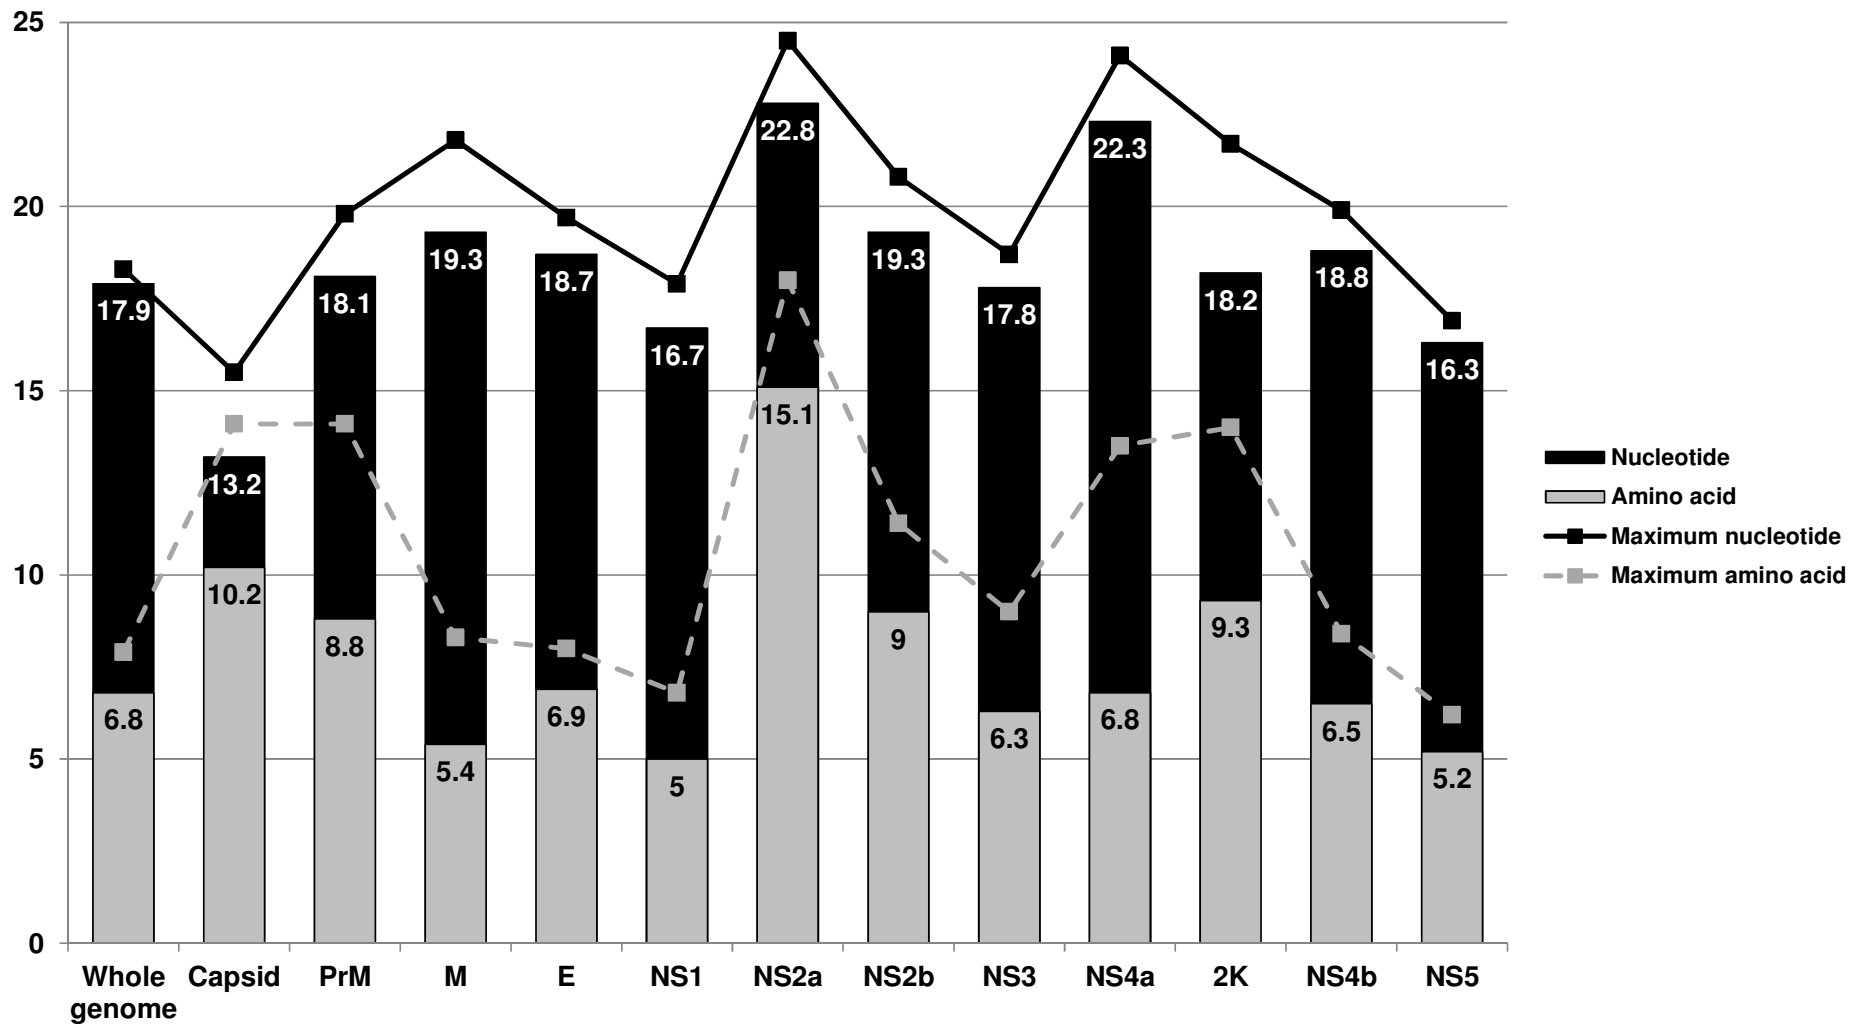

**Supplementary Figure S1.** Sequence diversity between Brun2014 and 53 dengue virus serotype 1 (DENV-1) strains. Average pairwise differences for the DENV-1 whole genome coding region and individual viral proteins are shown numerically for both nucleotide and amino acid sequence comparisons. Maximum pairwise differences are also plotted for nucleotide (solid line) and amino acid (dashed line) sequences respectively. Among individual viral proteins, nonstructural protein (NS) 2a was found to contain the highest nucleotide (22.8%) and amino acid (15.1%) differences. Alternatively, the least nucleotide and amino acid differences were demonstrated in the capsid (13.2%) and NS1 (5.0%) proteins respectively. Of note, estimated differences for the E protein were 18.7% (maximum 19.7%) for nucleotide and 6.9% (maximum 8.0%) for amino acid which were almost identical to the nucleotide (18.6%, maximum 19.9%) and amino acid (7.0%, maximum 8.2%) differences obtained with 100 DENV-1 sequences.

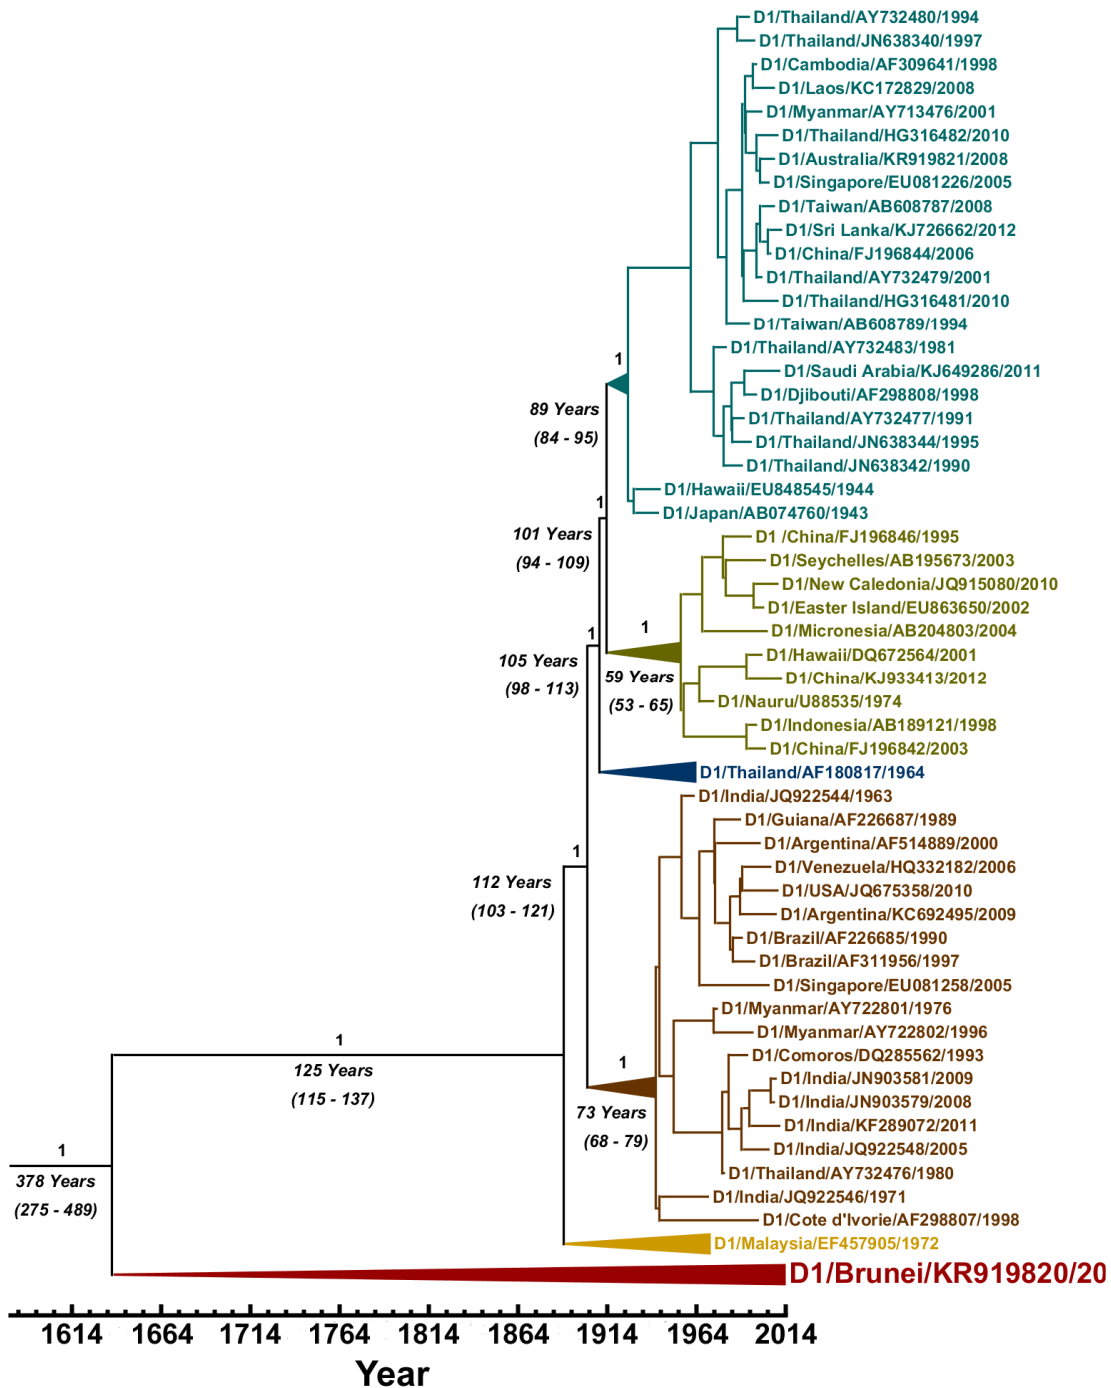

**Supplementary Figure S2.** Maximum clade credibility tree of 54 DENV-1 whole genome coding region sequences. All five major DENV-1 genotypes (I to V) are shown and compared to a new postulated sylvatic genotype (VI) containing the previously unknown strain, Brun2014. Horizontal branch lengths are drawn to scale and are proportional to time. Posterior probability values (1.0) are shown for key nodes together with corresponding divergence times and respective 95% HPD values (in parentheses).
